# Supplementary material for: Bioconversion of a lignin-derived biphenyl dimer into the strategic building block 5-carboxyvanillic acid in Pseudomonas putida KT2440
Source: Royal Society of Chemistry journal article supplement (doi:10.1039/d4gc06537a), 2025-01-01
Supplement: d4gc06537a1.pdf [file d4gc06537a1.pdf]

## Supplementary Information

### **Bioconversion of a lignin-derived biphenyl dimer into the strategic building block 5-carboxyvanillic acid in *Pseudomonas putida* KT2440**

Helena Gómez-Álvarez<sup>a c 1\*</sup>, Carlos del Cerro-Sánchez<sup>a c 1</sup>, Pablo Iturbe<sup>a</sup>, Virginia Rivero-Buceta<sup>a c</sup>, Juan Nogales<sup>b c</sup>, Timothy D. H. Bugg<sup>d</sup> and Eduardo Díaz<sup>a c \*</sup>

<sup>a</sup> Department of Biotechnology, Margarita Salas Center for Biological Research, Spanish National Research Council, Ramiro de Maeztu 9, 28040 Madrid, Spain

<sup>b</sup> Department of Systems Biology, National Centre for Biotechnology, Spanish National Research Council, Darwin 3, 28049 Madrid, Spain

<sup>c</sup> Interdisciplinary Platform for Sustainable Plastics towards a Circular Economy-Spanish National Research Council (SusPlast-CSIC), Madrid, Spain

<sup>d</sup> Department of Chemistry, University of Warwick, Coventry CV4 7AL, United Kingdom

\* Corresponding authors at: Department of Biotechnology, Margarita Salas Center for Biological Research, Spanish National Research Council, Ramiro de Maeztu 9, 28040 Madrid, Spain. E-mail addresses: ediaz@cib.csic.es (E. Díaz), hgomalv@cib.csic.es (H. Gómez-Álvarez).

<sup>1</sup> These authors contributed equally to this work.

## Supplementary Figures

Figure S1. Schematic representation of plasmids pIZDDVA\_K, pIZDDVA and p254DDVT. Generated with SnapGene 7.2.

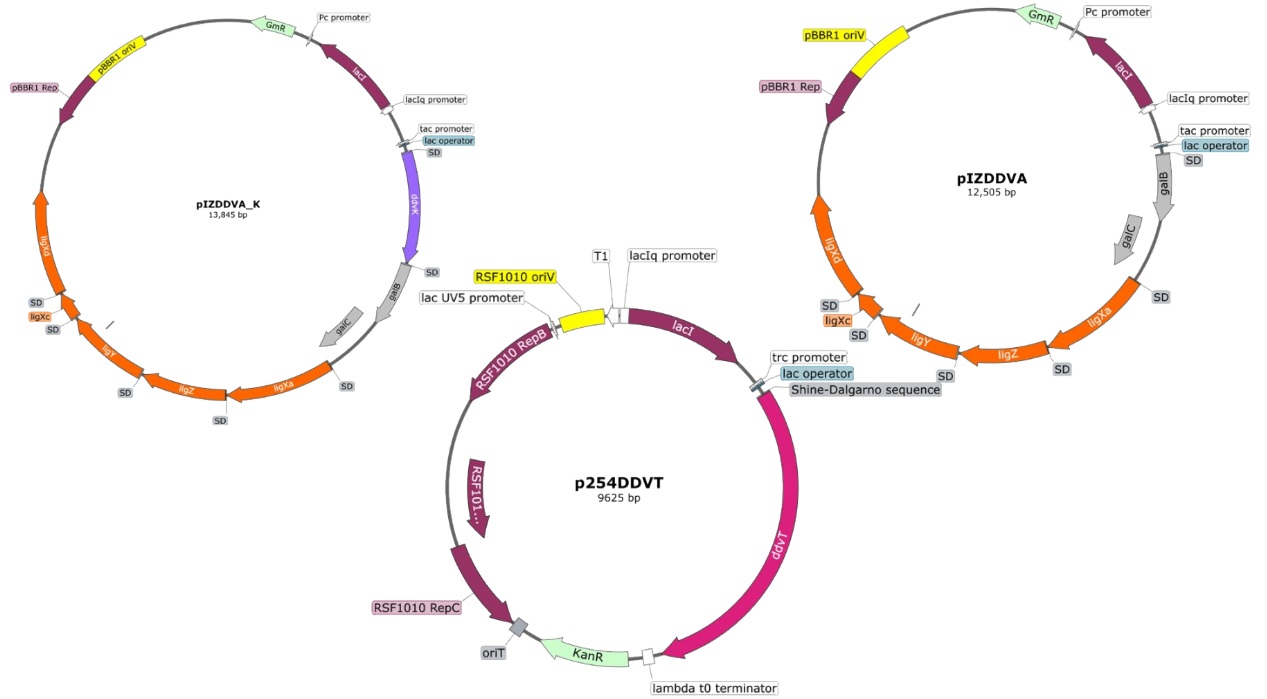

**Figure S2. LC/MS representative chromatograms.** (A) HPLC Chromatograms showing DAD signals at 230 nm. From top to bottom: signals corresponding to authentic DDVA, authentic 5CVA and sample taken from *P. putida* KT2440 (pIZDDVA\_K + p254DDVT) resting cells incubated during 5 days in the presence of 1 mM DDVA at pH 7.5. (B) HPLC chromatograms showing evolution of DAD signals at 230 nm over time of samples taken from resting cells experiments (1 mM DDVA, pH 7.5) with *P. putida* KT2440 bearing either empty plasmids pIZ1016 and pSEVA254 (top) or pIZDDVA\_K and p254DDVT (bottom). (C) MS spectrum corresponding to peaks at retention times 3.5 (top), 6.8 (middle) and 9.4 (bottom) minutes from the sample shown in panel B (down). Expected  $m/z$  values in this MS method for DDVA pathway intermediaries and final product are: OH-DDVA, 321; DCHM-HOPDA, 350.23; 5CVA, 213.16.

A

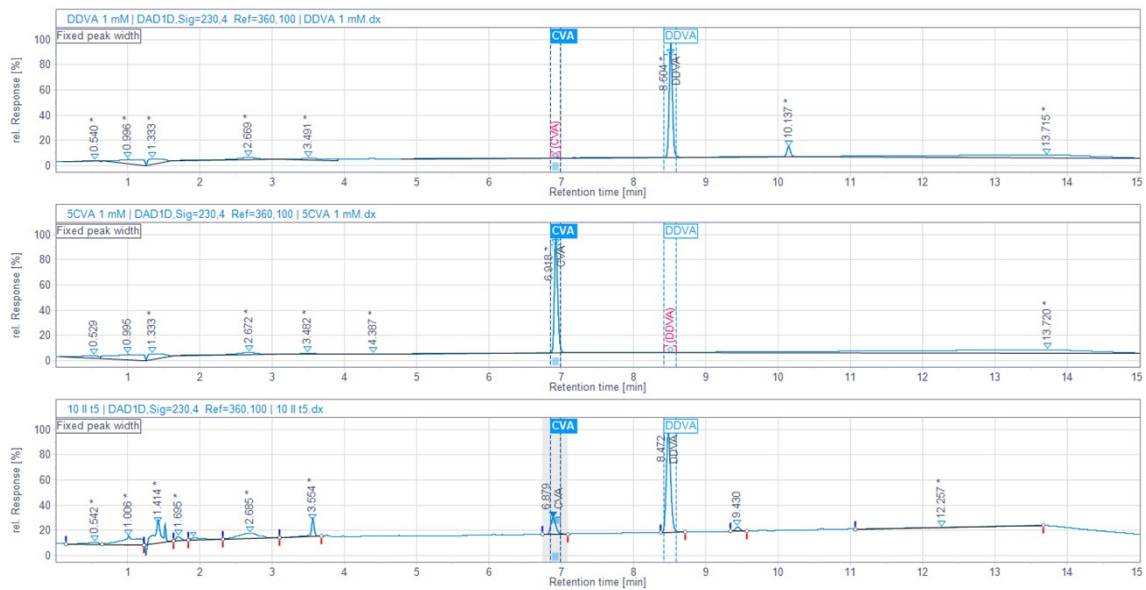

B

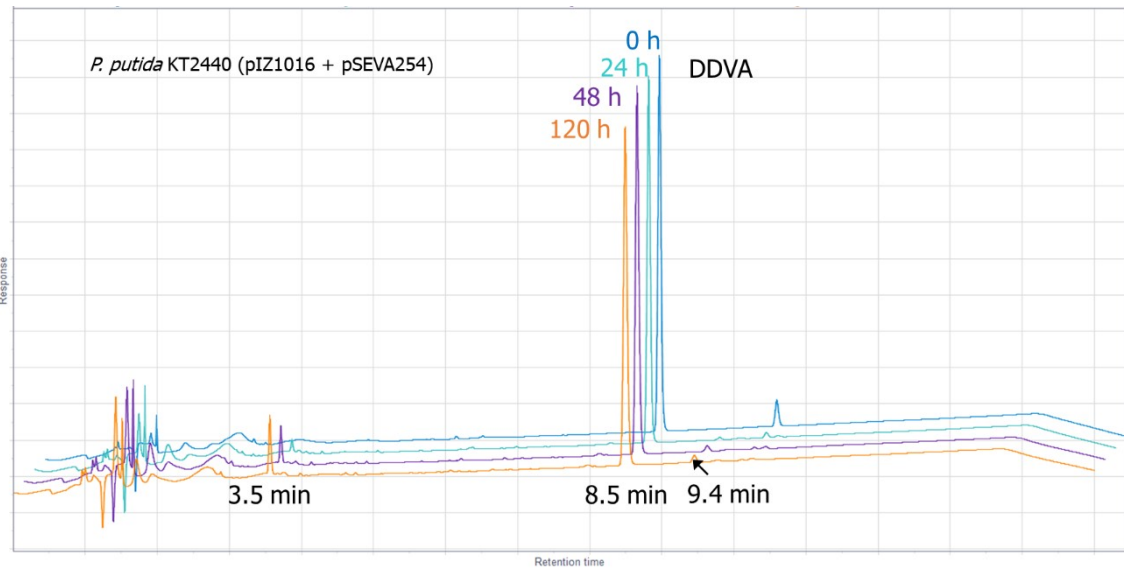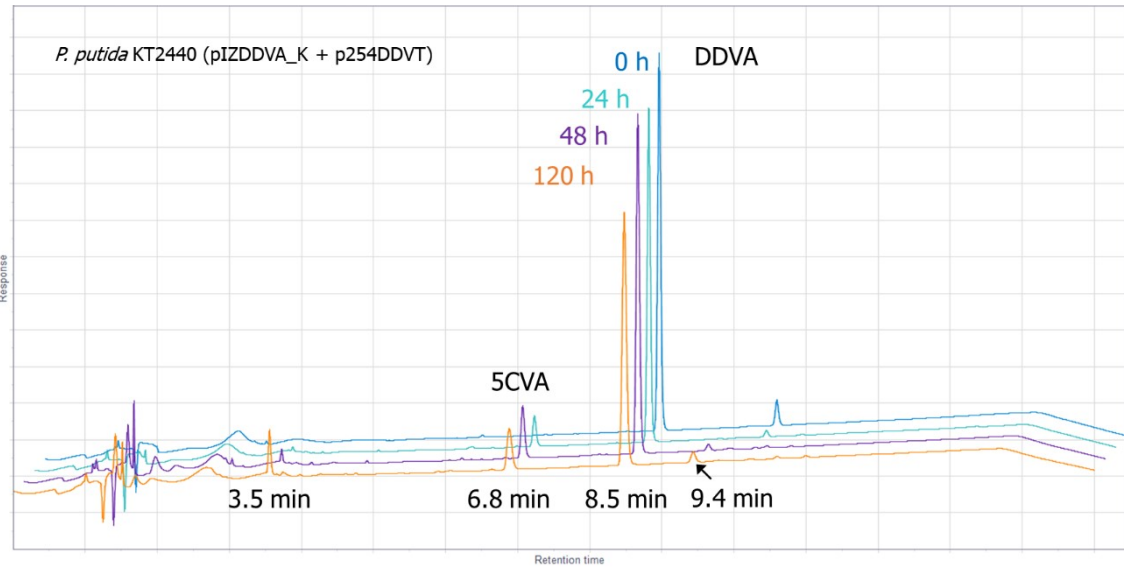

C

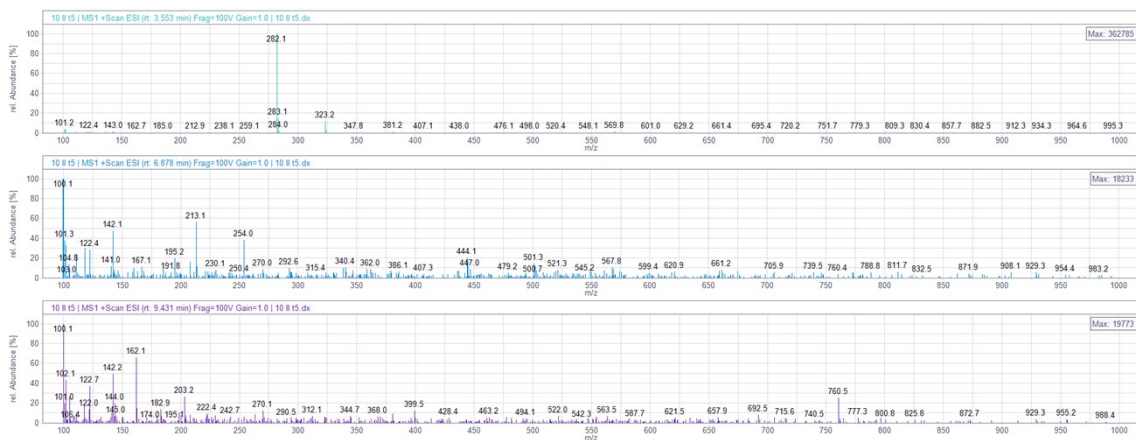

**Figure S3 Identification of a consensus TonB box in *P. putida* and functional analysis of a chimeric DdvT\* transporter.** (A) Amino acid sequence alignment of 11 putative TonB boxes of TonB-dependent transporters from *P. putida* KT2440 and the BtuB receptor from *P. aeruginosa* with the TonB box region of the DdvT transporter from *S. lignivorans* SYK6 (highlighted in purple). Colors indicate similarity (dark pink indicates similar residues in all sequences, light pink indicates similar residues in more than 80% sequences, and white indicates similar residues in less than 80% sequences) considering a Blossum62 score matrix. Logo image was modified from the obtained using WebLogo 3 tool.<sup>55</sup> (B) 5CVA production profile from 1 mM DDVA using resting cells of *P. putida* KT2440 containing plasmid pIZDDVA\_K and plasmid p254DDVTB (encodes the chimeric DdvT\* transporter). Samples were taken at 0, 4, 24, 48, 72, and 120 hours. DDVA consumption and 5CVA production are indicated with discontinuous and continuous lines, respectively. All the resting cells experiments were performed in triplicates. Error bars represent standard deviation of the triplicates.

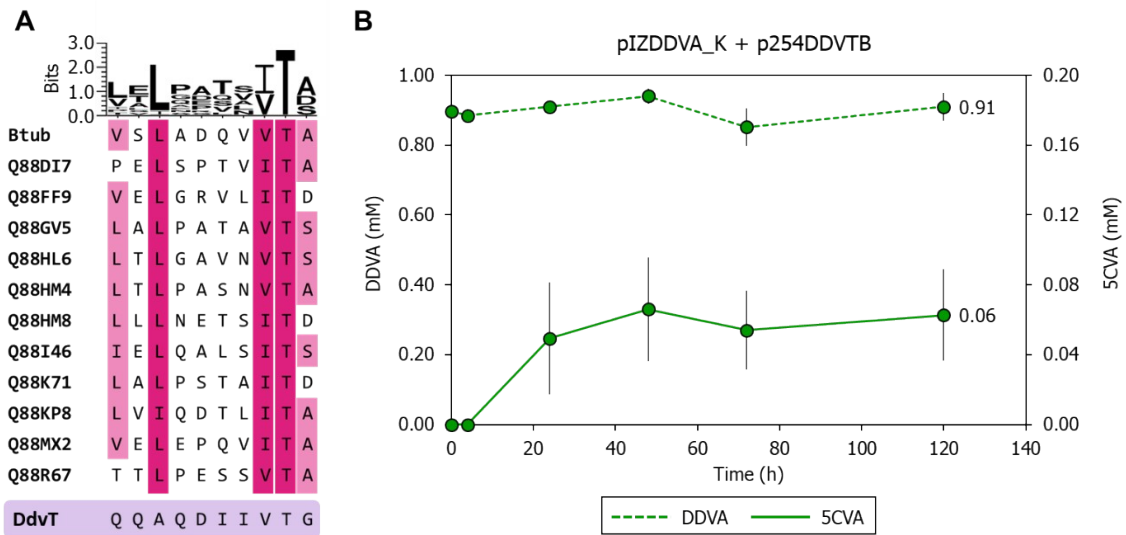

**Figure S4. 5CVA production over time with *P. putida* KT2440 (pIZDDVA\_K, p254DDVT) cells.** Cells were grown in LB medium, M63 medium with 20 mM glucose, or M63 medium with 15 mM octanoate, and then collected ( $OD_{600}$  24) for biotransformation of 1 mM DDVA in resting cells conditions.

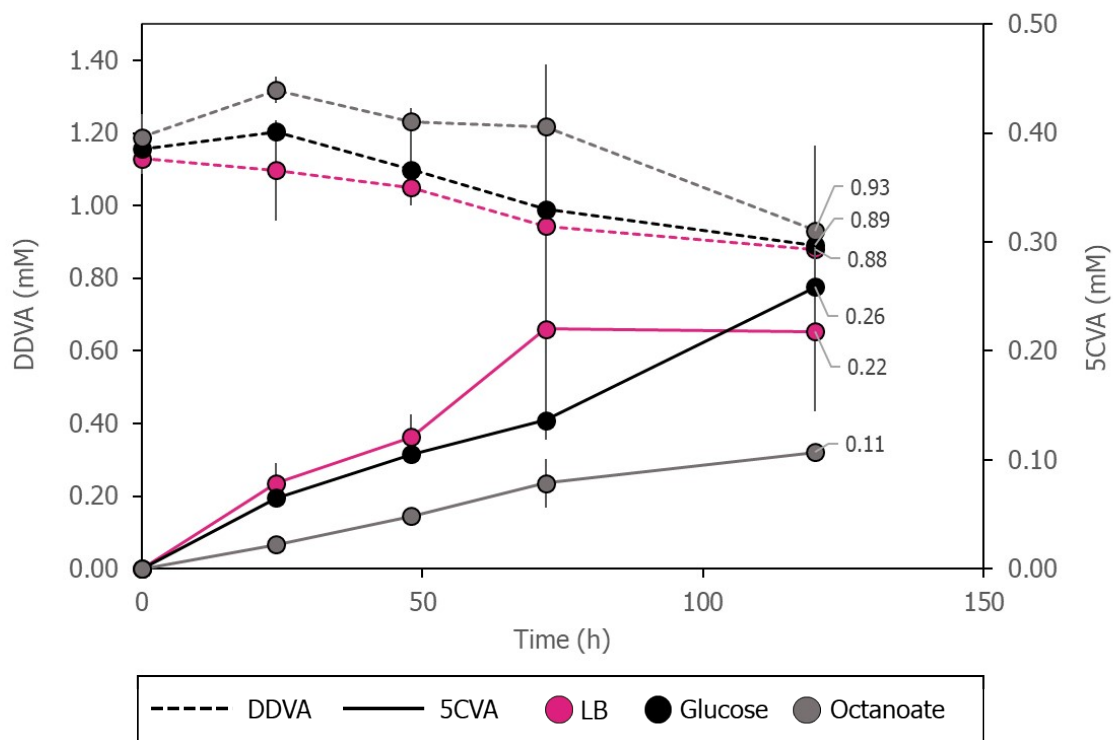

## Supplementary Tables

Table S1. Oligonucleotides used in this study.

| Primer                     | Sequence (5'-3')                                                                           |
|----------------------------|--------------------------------------------------------------------------------------------|
| 5 ligX                     | CGGCCGCGCGAATTCGAGCTCGGTACCCTAAGGAGGTGATCTAATGCTGTCCGCAGACCAGAACGACAAGCTG                  |
| 3 ligX                     | TATCCTCTCCCAACCTCCTCTTCGGCACCGCATTAGATCACCTCCTTATCACGCGTCGACATAGCCCTTGT<br>TATCCTG         |
| 5 ligY                     | TTCGTGGCCTGGCAATAAGCGAACCGCTTTAAGGAGGTGATCTAATGATCATCGACTGCCATGGTCACGT<br>CAGCGCTCCGGTGGGA |
| 3 ligY                     | ATGCCTGCAGGTCGACTCTAGAGGATCCCCTCAAACGTCCAAATTAACACCTTCCGCGCATTATC                          |
| 5 ligZ                     | CAGGATAACAAGGGCTATGTCGACGCGTGATAAGGAGGTGATCTAATGCGGTGCCGAAGAGGAGTTGGGA<br>GAGGATA          |
| 3 ligZ                     | TCCACCGGAGCGCTGACGTGACCATGGCAGTCGATGATCATTAGATCACCTCCTTAAACGCGTTCGCTTA<br>TTGCCAGGCCACGAA  |
| ligXc_Fw                   | ATATATCTAGAAAGGAGGTGATCTAATGGCGCAGCTGAAGGTCG                                               |
| ligXc_Rv                   | ATATAAAGCTTTCATCCTCCGGGCGATGGT                                                             |
| ligXd_Fw                   | ATATAAAGCTTAAGGAGGTGATCTAATGCCGCATTTTGATTGCCTTA                                            |
| ligXd_Rv                   | ATATAACTAGTTCATCCCTGCGCGCGGTCA                                                             |
| ligXa tune Fw KpnI         | CGGGGTACCCTAAGGAGGTGATCTAATGCTGTCCGCAG                                                     |
| ligXa tune Rv NheI<br>NdeI | AAGCAAGCTAGCCATATGATCACCTCCTTATCACGCGTCGACAT                                               |
| ligZ tune Fw NdeI          | ATATATCATATGGCCGAAATCGTGTGGGT                                                              |
| ligZ tune Rv XhoI          | TCCGCTCGAGCGTTCGCTTATTGCCAGGCCACGAAGC                                                      |
| ligY tune Fw NheI<br>XhoI  | AAGCAAGCTAGCCTCGAGAAGGAGGTGATCTAATGATCATCGACTGCCATGG                                       |
| ligY tune Rv<br>BamHI      | CCGGGATCCCCTCAAACGTCCAAATTAACAC                                                            |
| MFS Fw AvrII               | ATATCCTAGGAAGGAGGTGATCTAATGGAGAGGATGACGATGGCA                                              |
| MFS Rv EcoRI               | TATATGAATTCTCAGTCCGGGATTTTGCGCG                                                            |
| galBC Fw AvrII<br>EcoRI    | TATCCTAGGAATTC AAGGAGGTGATCTAATGACATCCTGCGCCACCC                                           |
| galBC Rv SacI              | ATAGAGCTCTCAGCCTTCCAGGTCGGTGA                                                              |
| XmaI lig frag Fw           | ATATATCCCGGAAGGAGGTGATCTAATGGAGAG                                                          |
| SpeI lig frag Rv           | ATATATACTAGTTCATCCCTGCGCGCGGTC                                                             |
| oDCS7                      | GGGTGGGCGCAGGATGTCATTAGATCACCTCCTTCCCGGGC                                                  |
| oDCS8                      | ATGACATCCTGCGCCACCCC                                                                       |
| ddvT_Fw_SD_XbaI            | TATATTCTAGATGACCTAAGGAGGTAATAATGGCTCGCGGAACGTAATTG                                         |
| ddvT Rv NheI               | TATATGCTAGCTCAGAAGCCGAACCGCAC                                                              |
| LELPATVITA_Rv              | CGCGGTGATGACGGTGGCCGGCAGCTCCAGCGCCGTCATTTCTGAGC                                            |
| LELPATVITA_Fw              | CTGGAGTGCCTGGCCACCGTCATCACCGCTCGCGCGTGGCCCGAAGC                                            |
| ddvT_Rv_HindIII            | TGACTGAAGCTTTCAGAAGCCGAACCGCAC                                                             |
